# Supplementary material
Source: PubMed Central journal article supplement (PMC4158689)

## **Orozco et al. Supplementary Material**

→3 Supplementary Figures with legends

→Legends for Supplementary Movies 1&2, which are available online.

### **Orozco et al. Supplementary Figure Legends:**

**Fig. S1: A)** Jax cells, which express endogenous RIPK3, or NIH-3T3 cells, which do not, were treated with 10ng/ml recombinant TNF along with inhibitors as indicated. **B)** Lysates from Jax cells, or NIH-3T3 cells stably expressing indicated constructs, were resolved by Western blot using the indicated antibodies. Note that the RIPK3 antibody used recognizes an epitope in the C-terminus, which is lacking in the RIPK3<sup>ΔC</sup> construct. **C&D)** NIH-3T3 cells stably expressing RIPK3-1xFV were treated with recombinant TNF, 30μM Nec1, 50μM zVAD, or 200ng/ml TNFR1-Fc as indicated. \**p* =0.0002. **E-H)** NIH-3T3 cells stably expressing catalytically inactive RIPK3<sup>K51A</sup>-1xFV, phosphorylation site mutant RIPK3<sup>T231A,S232A</sup>-1xFV, RHIM domain point mutant RIPK3<sup>ΔRHIM</sup>-1xFV, or RHIM-truncated RIPK3<sup>ΔC</sup>-1xFV were treated as indicated. **I)** NIH-3T3 cells stably expressing the indicated constructs were lysed and resolved by western blotting. Jax cells are included as a control for endogenous RIPK3 expression.

**Fig. S2: A)** NIH-3T3 cells were transfected with indicated siRNAs. Seventy-two hours later, lysates were collected and expression of indicated proteins was assessed by western blot. **B)** NIH-3T3 cells stably expressing RIPK3-1xFV were treated with 30nM AP1, 50μM zVAD and 200ng/ml TNFR1-Fc as indicated. **C)** Densitometric analysis of the RIPK3 dimer and oligomer bands depicted in Fig. 2D. **D)** 3T3-NIH cells stably expressing RIPK3-1xFV were treated with AP1, then lysates were collected and subjected to DSS-mediated chemical crosslinking. These complexes were then resolved by western blotting using the indicated antibodies. **E)** RIPK1-associated immunocomplexes were purified as described in Fig. 1E, and co-precipitation of FADD was assessed by western blotting. **F)** NIH-3T3 cells stably expressing RIPK3<sup>ΔC</sup>-2xFV were transfected with indicated siRNAs. Seventy-two hours later these cells were treated as indicated. All cell death measurements were performed using an IncuCyte bioimager as described.

**Fig. S3: A)** Schematic representation of the destabilization domain (DD)-RIPK3 construct used. A DD-RIPK3 chimeric open reading frame was created by recombinant

PCR, then cloned upstream of a T2A-GFP-T2A-PURO sequence. Of note, both DD-RIPK3 and GFP protein include a C-terminal 2A epitope. **B)** NIH-3T3 cells stably expressing DD-RIPK3 were pre-treated with 1 $\mu$ M Shield drug for 8 hours to stabilize RIPK3 expression, then treated with 1ng/ml TNF and 50 $\mu$ M zVAD as indicated. \*P=0.0024 **C)** NIH-3T3 cells stably expressing DD-RIPK3 were treated with 1 $\mu$ M Shield drug and 200ng/ml TNFR-Fc as indicated. \**p* =0.0004 **D)** NIH-3T3 cells stably expressing catalytically inactive DD-RIPK3<sup>K51A</sup> were treated with 1 $\mu$ M Shield drug as indicated. All cell death measurements were performed using an IncuCyte bioimager as described.

**Supplemental Movies 1&2:** A representative image set acquired from the IncuCyte imager. These images are NIH-3T3 cells stably expressing RIPK3-1xFV, treated with 10nM AP1 (see **Fig. 1B** for a quantified graphical representation of this cell death). **Movie 1** shows one field of these cells undergoing RIPK3-dependent cell death; the media contains the cell impermeable DNA binding dye Sytox Green, which marks cells that have lost membrane integrity in green. **Movie 2** depicts the same image set, following analysis by the IncuCyte software package. This software counts each green (dead) cell in each image; counted cells are surrounded by purple halos. Each trace shown in this manuscript depicts data averaged from at least 3 independently treated wells of cells, each of which is imaged in at least 4 separate fields. Each experiment shown is representative of at least 3 separate replicates. All experiments on stably transduced cells is representative of at least three separate replicates performed on each of at least two distinct, independently-derived stable lines.

# Orozco et al. Supplementary Fig.1

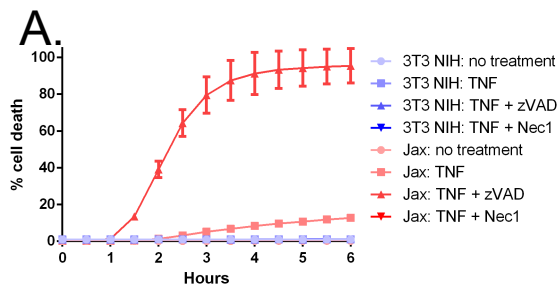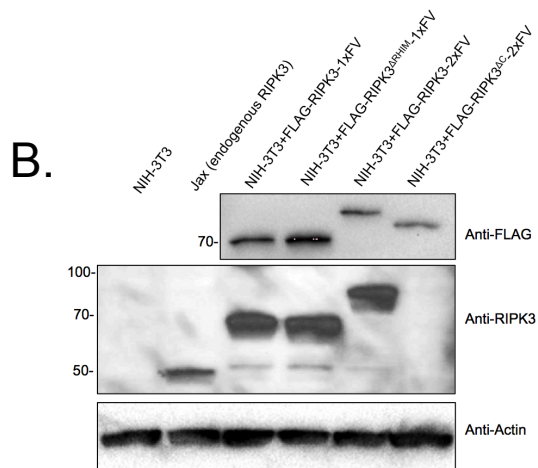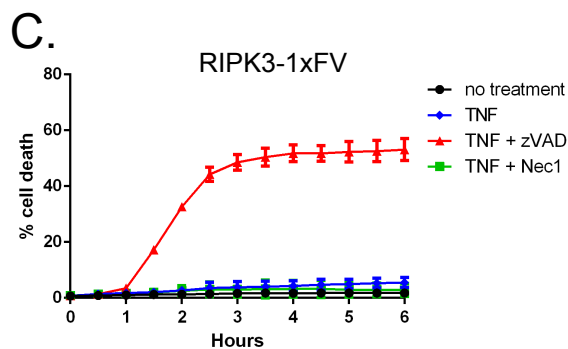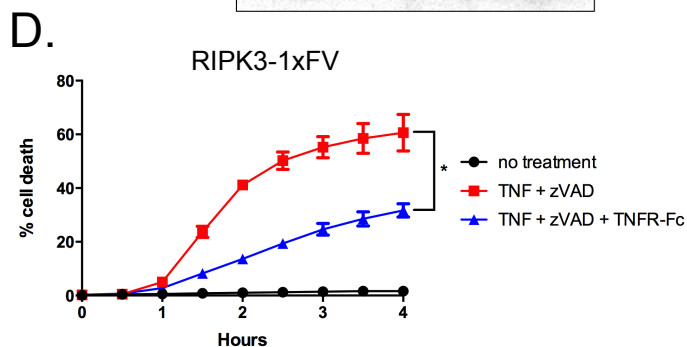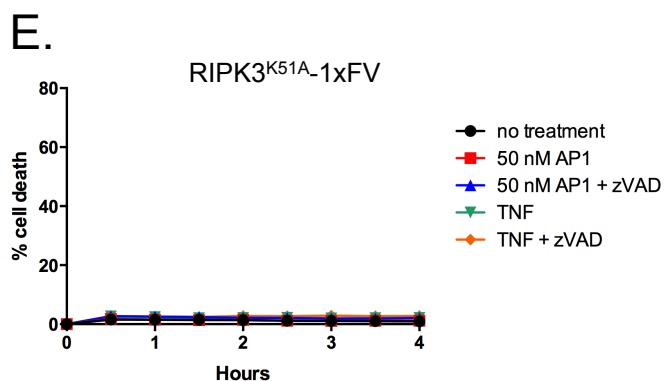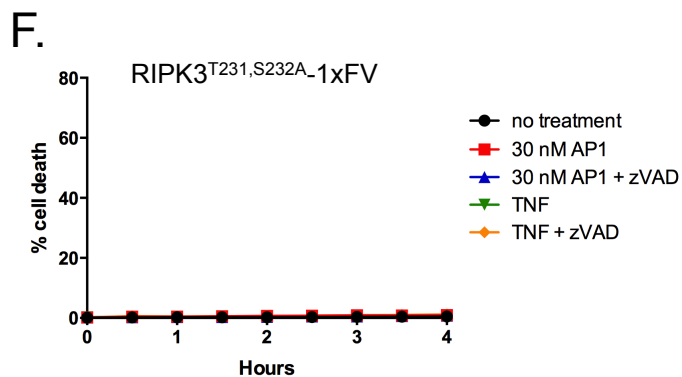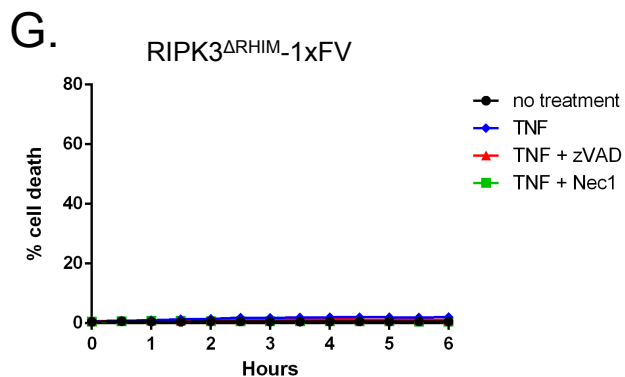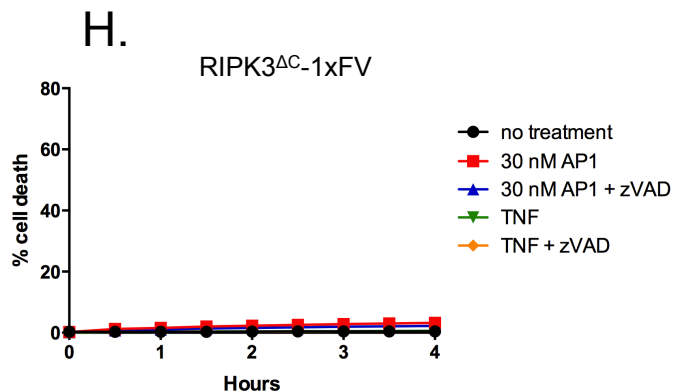

Orozco et al. Supplementary Fig.1, cont.

I.

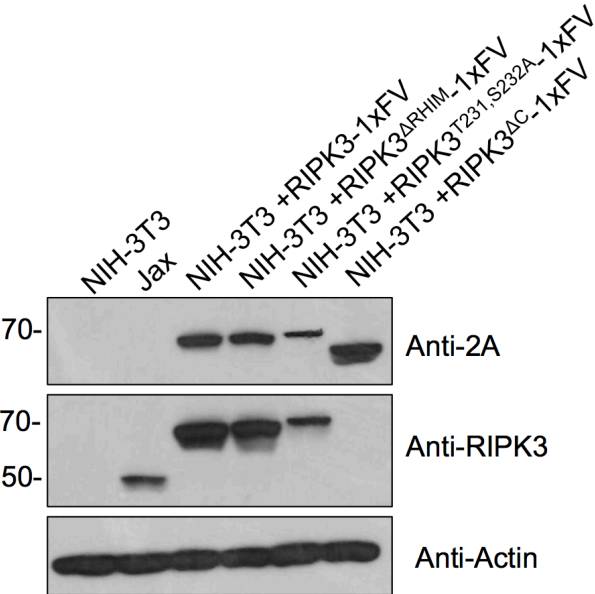

# Orozco et al, Supplementary Fig. 2

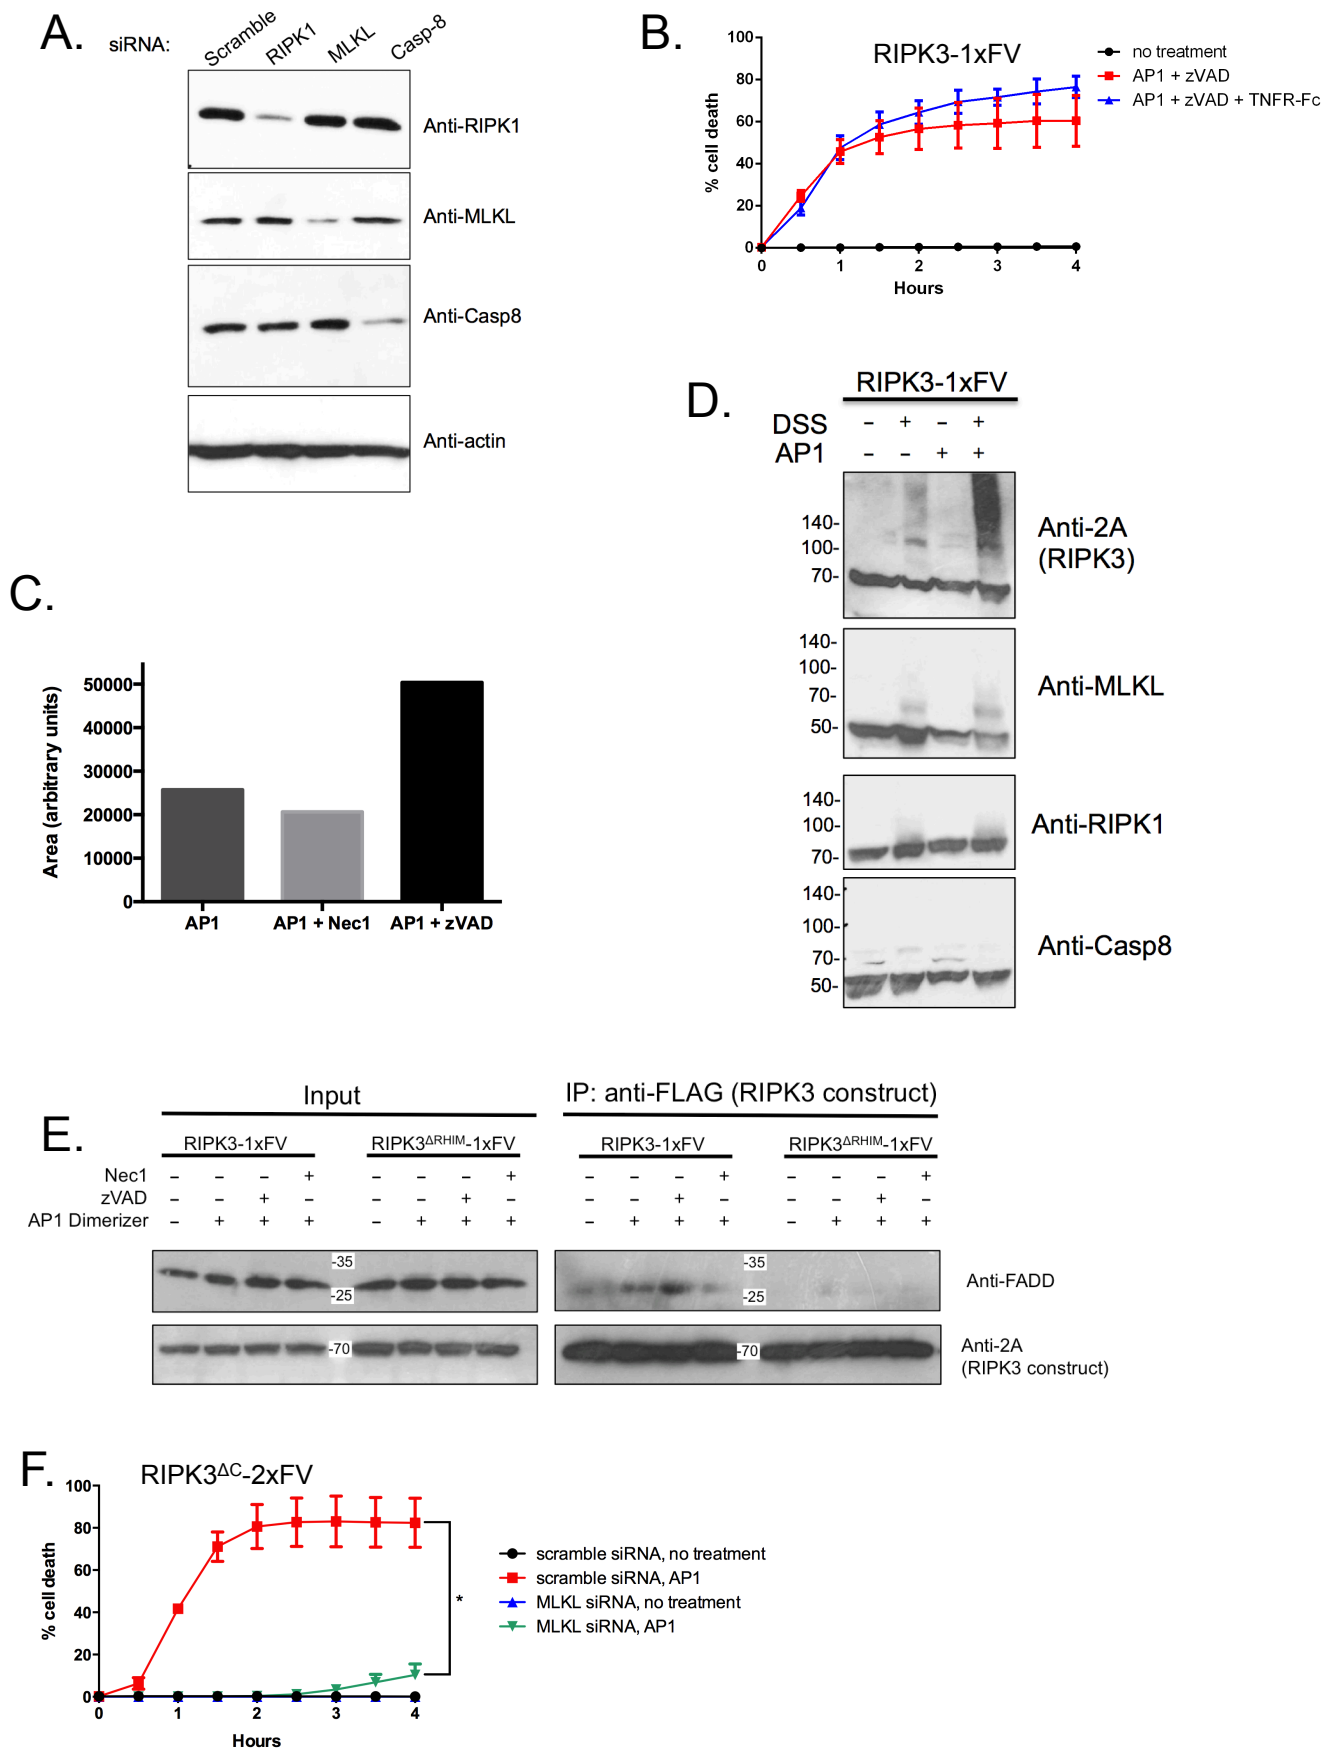

# Orozco et al., Supplementary Fig. 3

A.

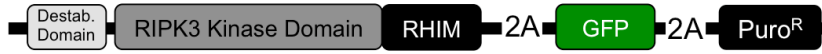

B.

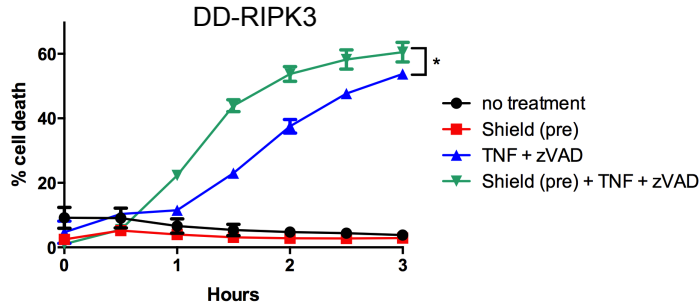

C.

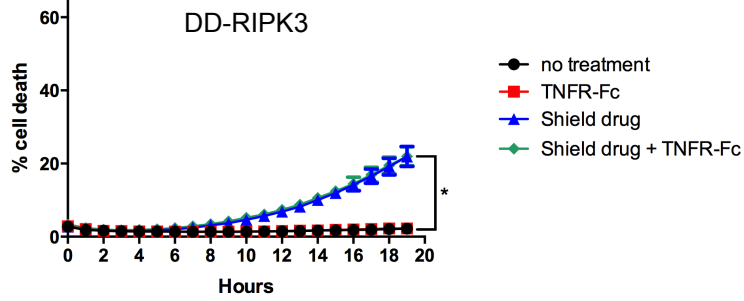

D.

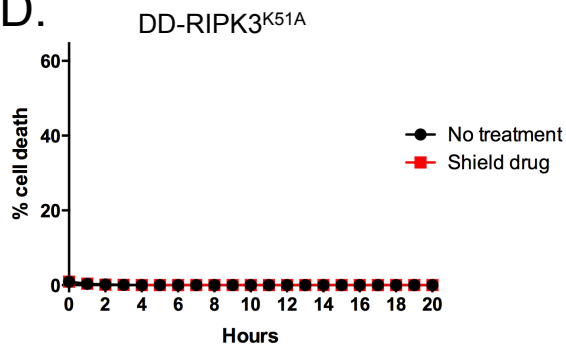

Supplement: cdd201476x3.pdf [file cdd201476x3.pdf]
